# Supplementary material for: Technical note: A high-resolution inverse modelling technique for estimating surface CO 2 fluxes based on the NIES-TM–FLEXPART coupled transport model and its adjoint
Source: Copernicus journal article supplement (doi:10.5194/acp-21-1245-2021), 2021-01-29

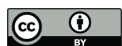

*Supplement of*

**Technical note: A high-resolution inverse modelling technique for estimating surface CO<sub>2</sub> fluxes based on the NIES-TM–FLEXPART coupled transport model and its adjoint**

**Shamil Maksyutov et al.**

*Correspondence to:* Shamil Maksyutov ([shamil@nies.go.jp](mailto:shamil@nies.go.jp))

The copyright of individual parts of the supplement might differ from the CC BY 4.0 License.

## Supplement

Fig. S1. Time series plots for monitoring sites used in inversion (blue – observed, plum – forward, green – optimized)

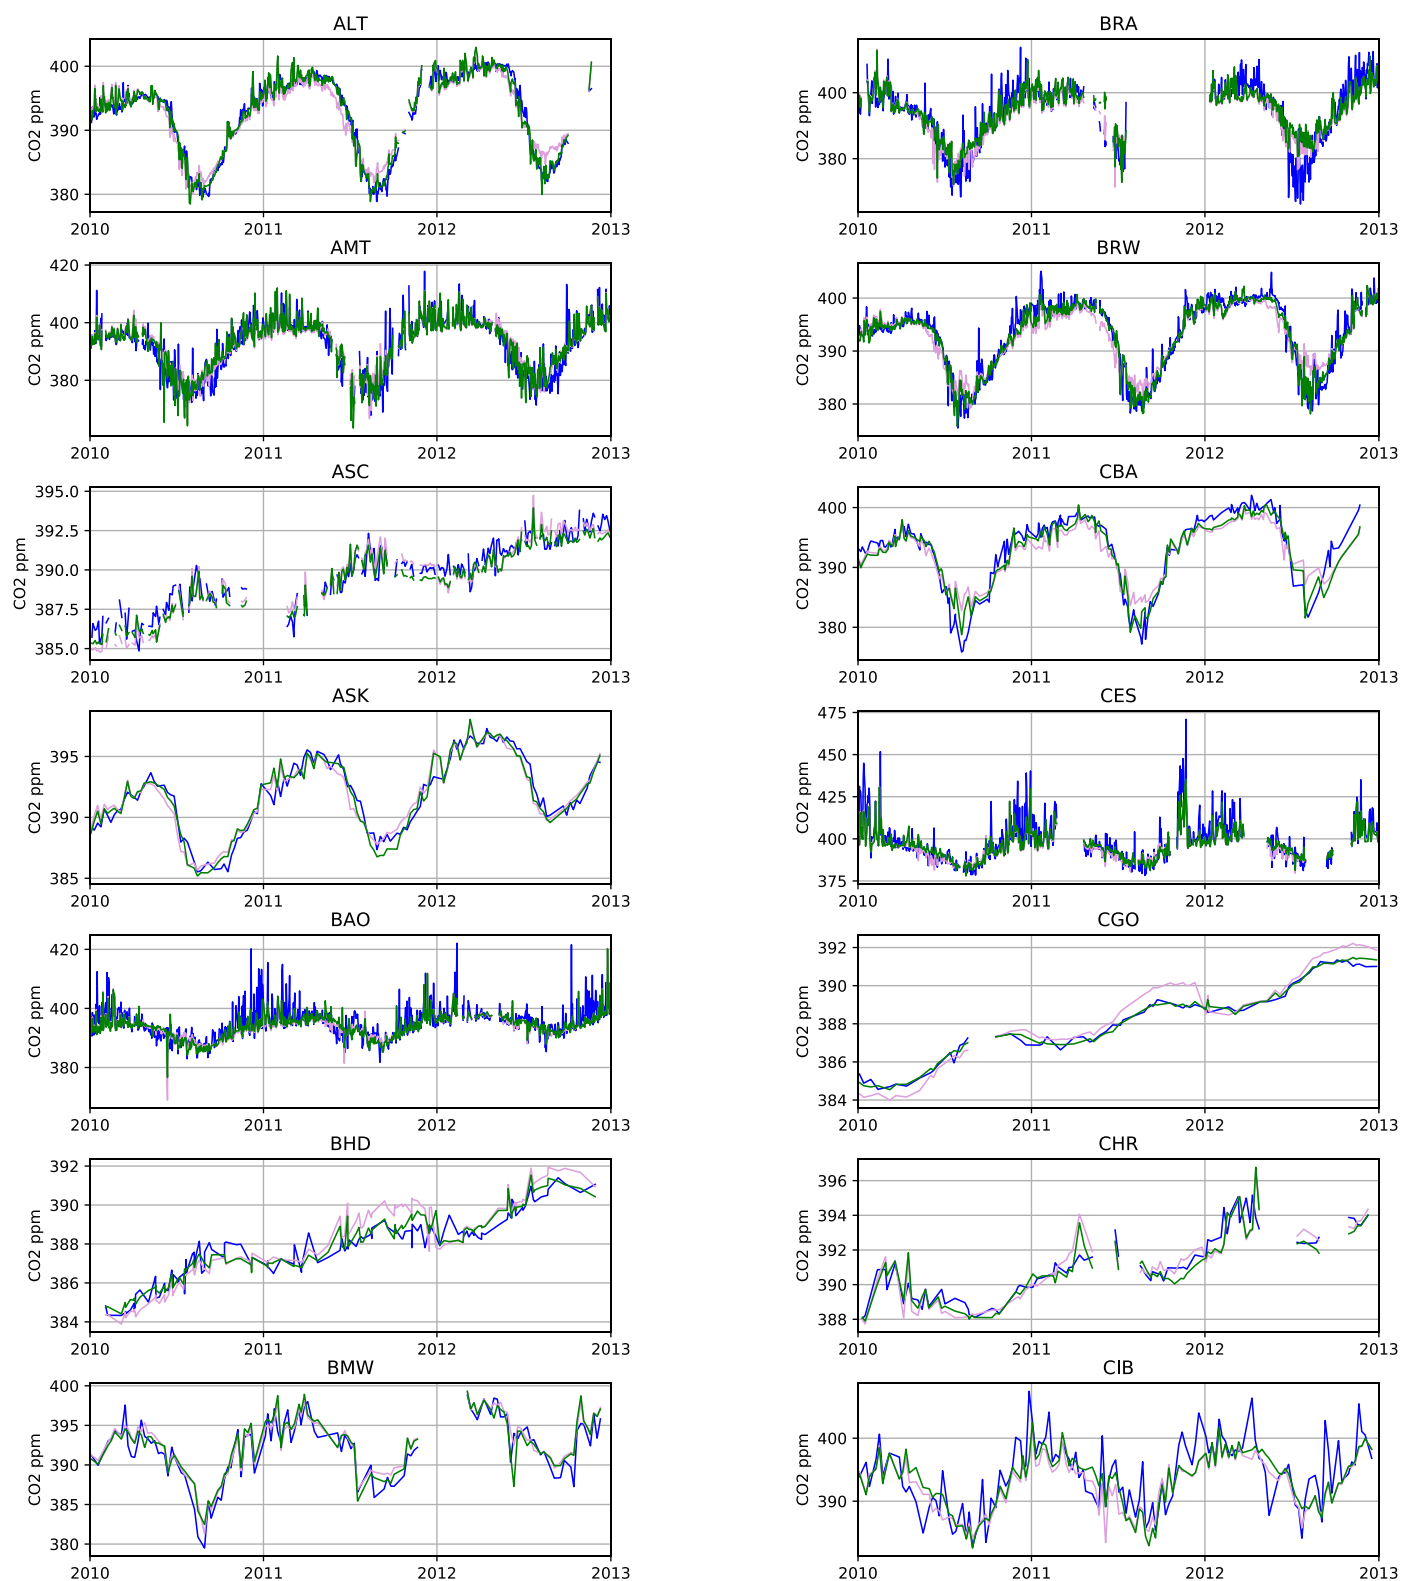

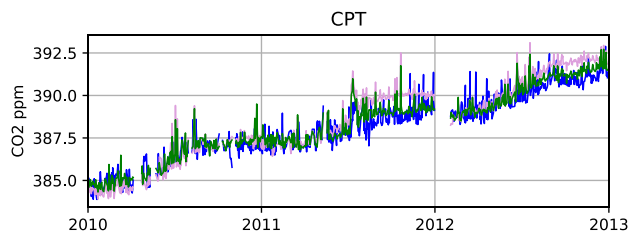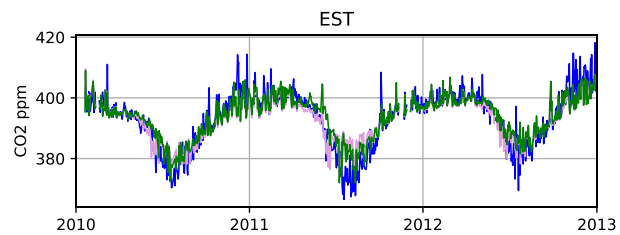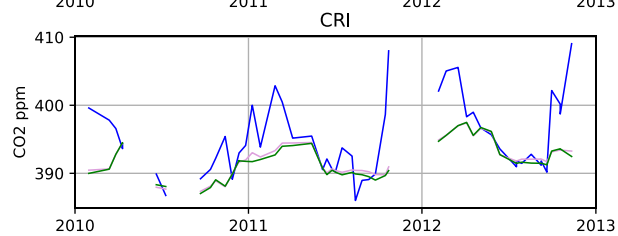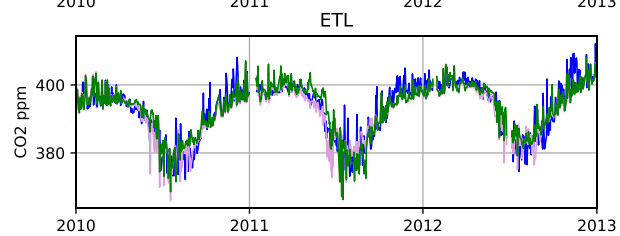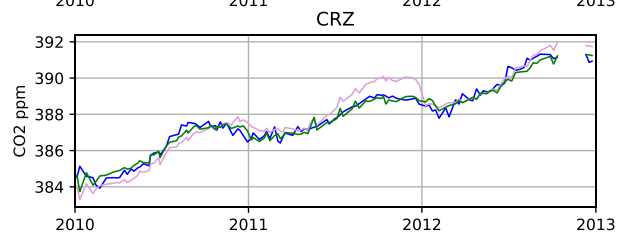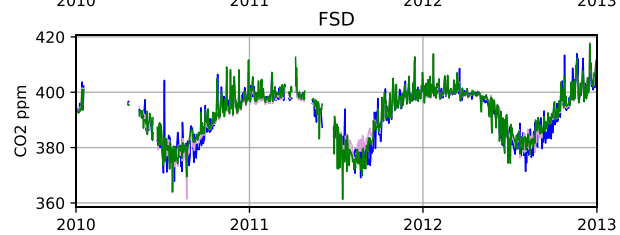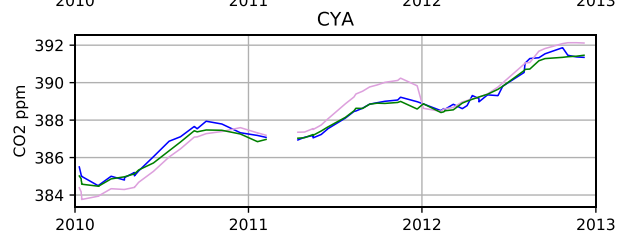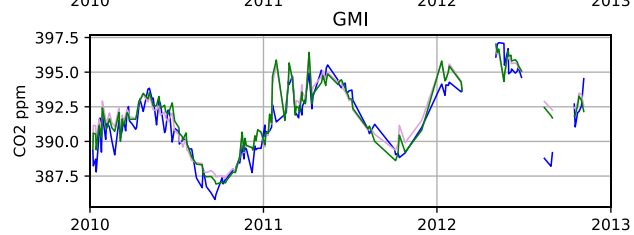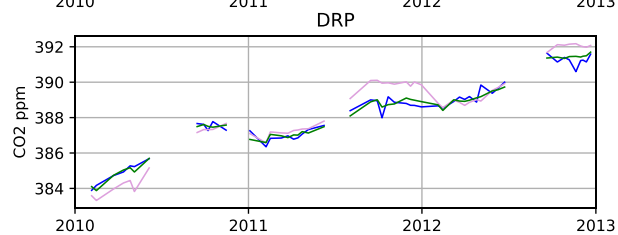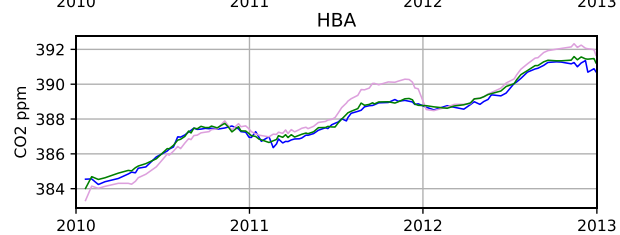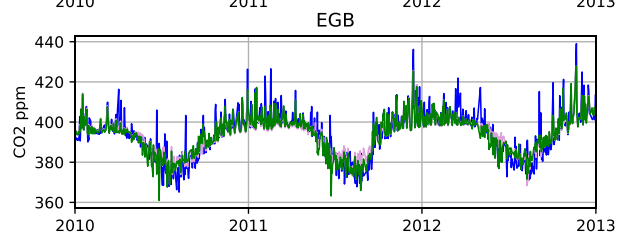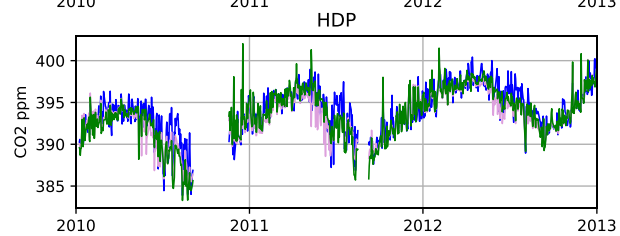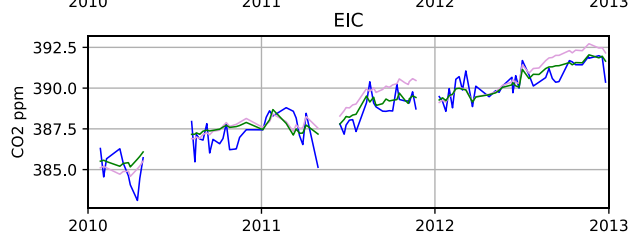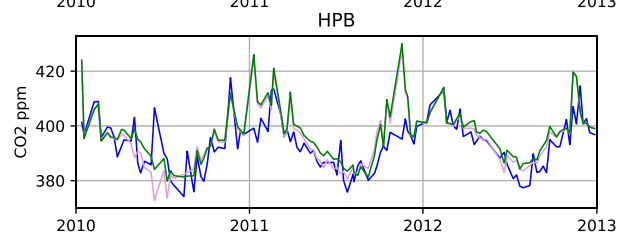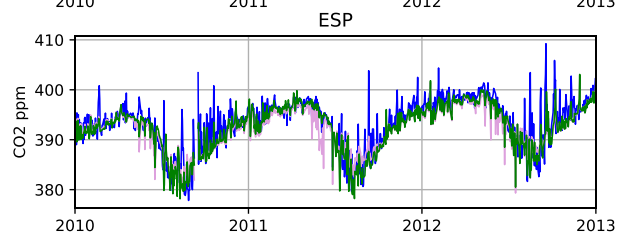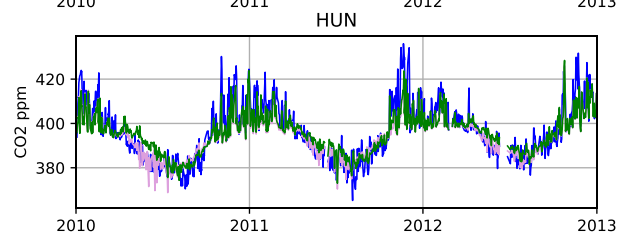

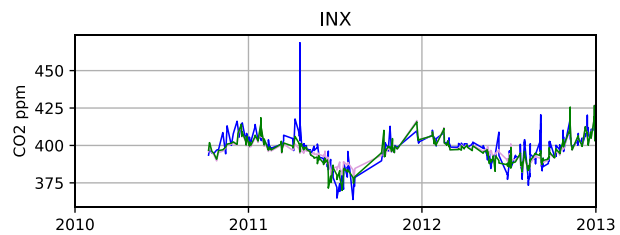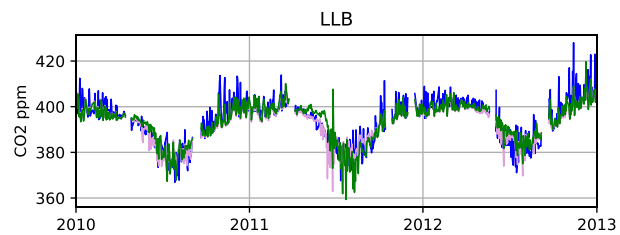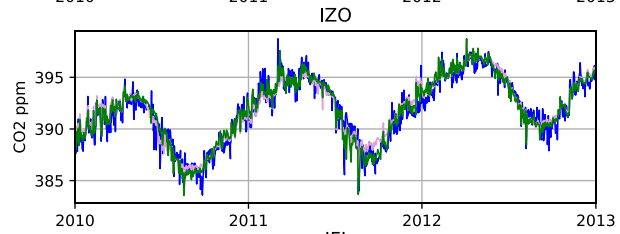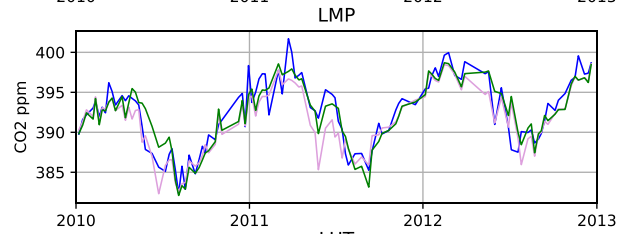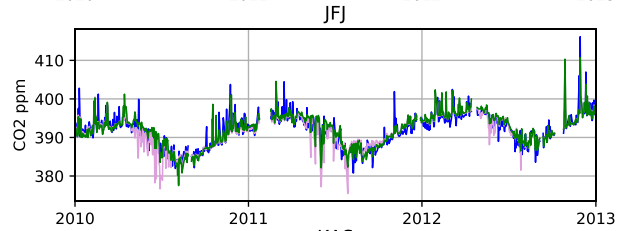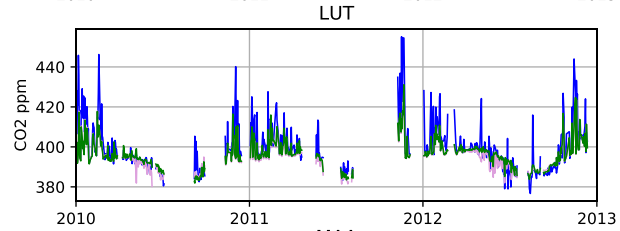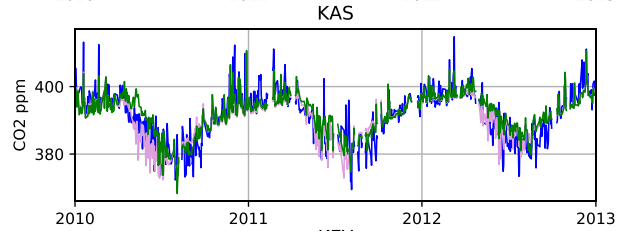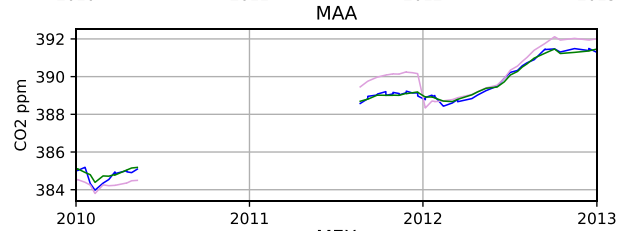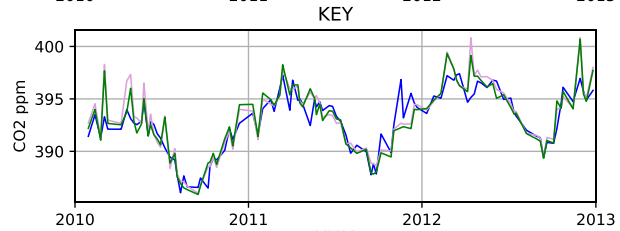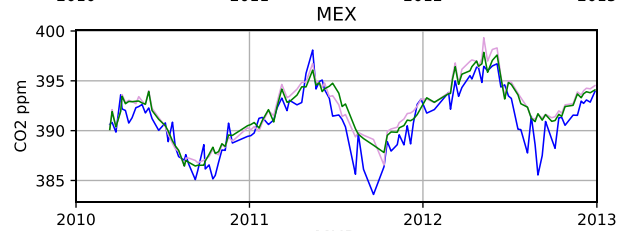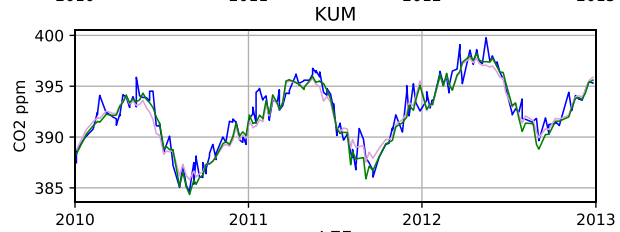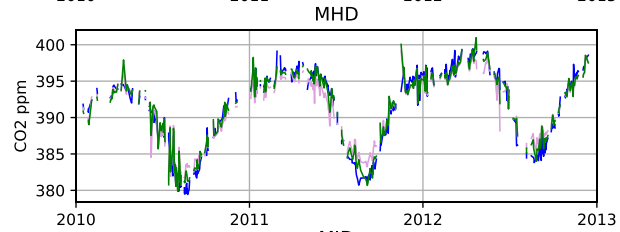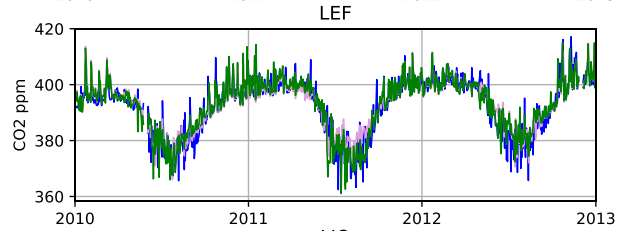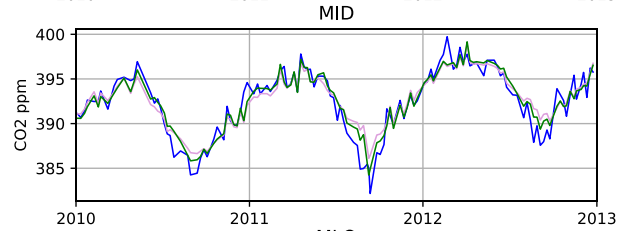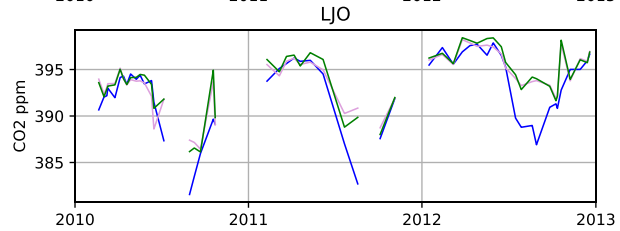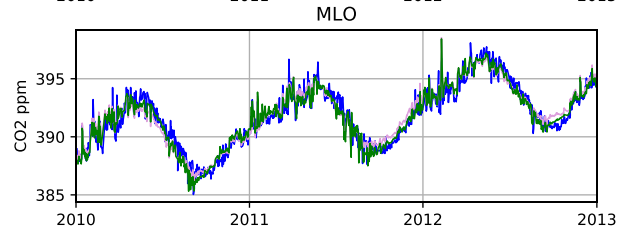

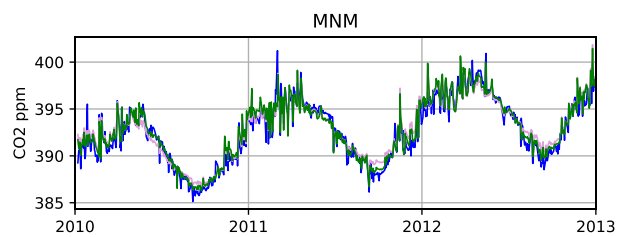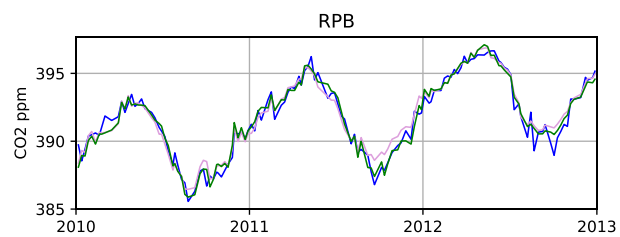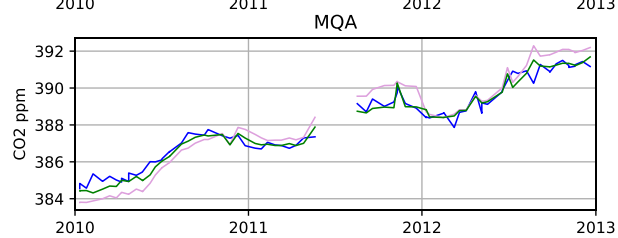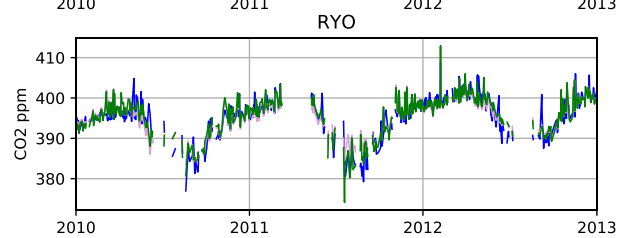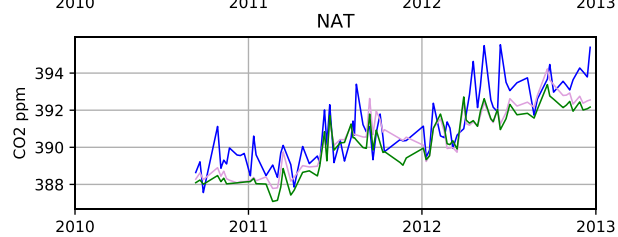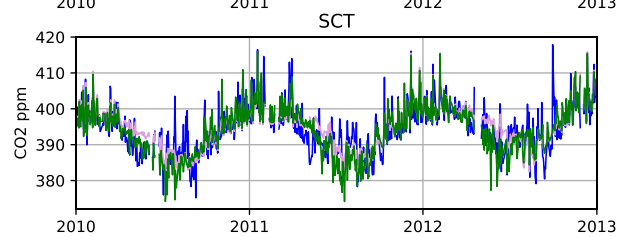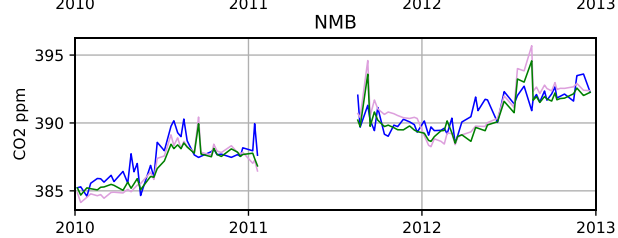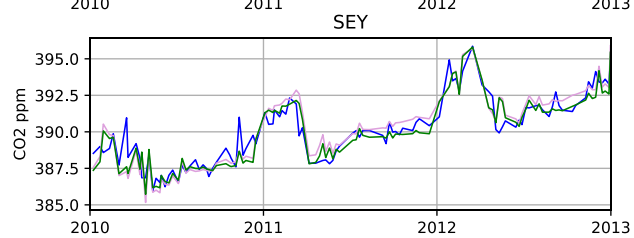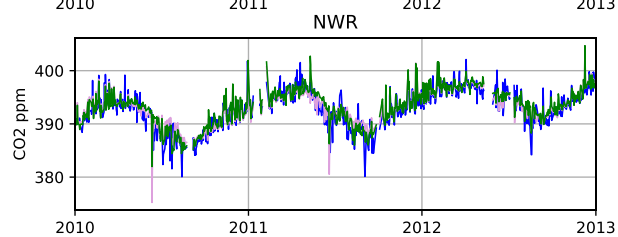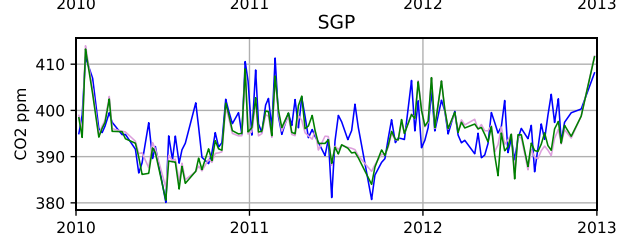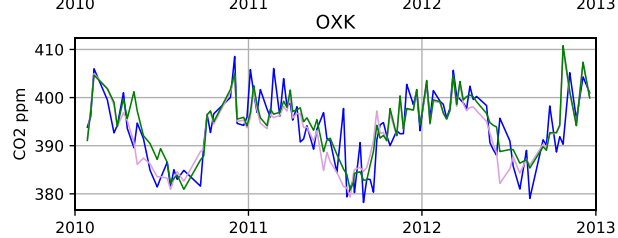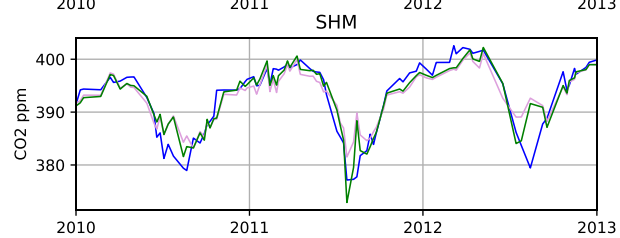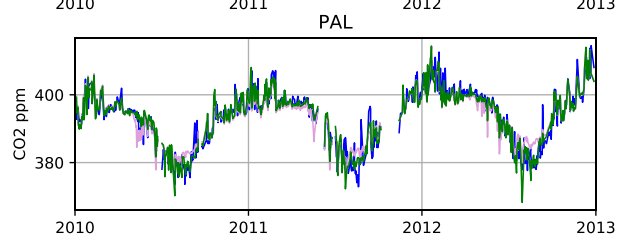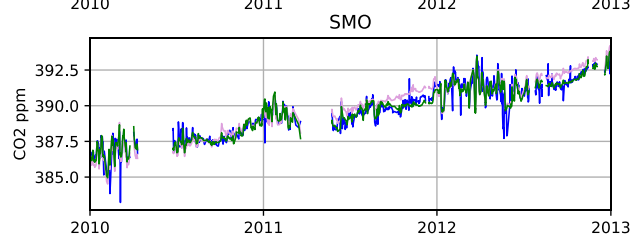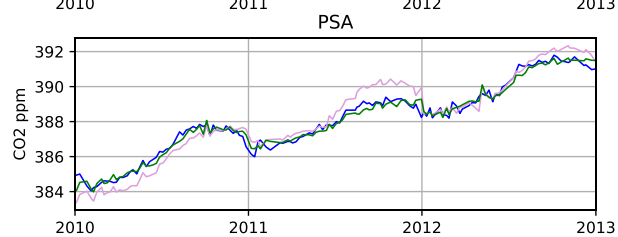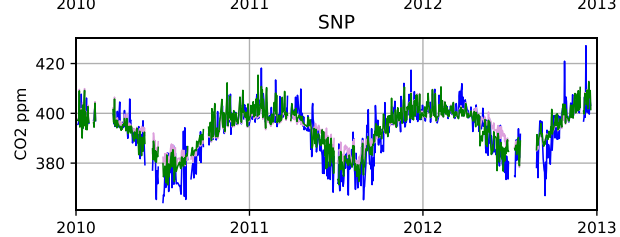

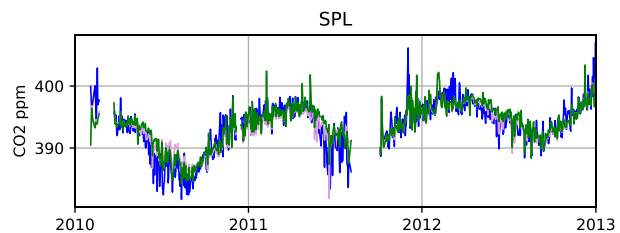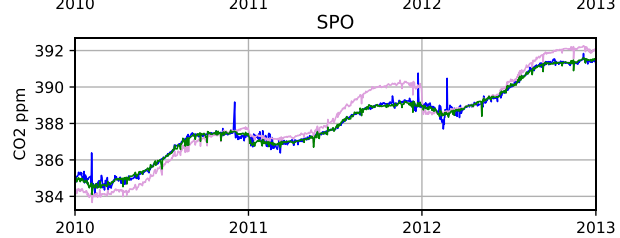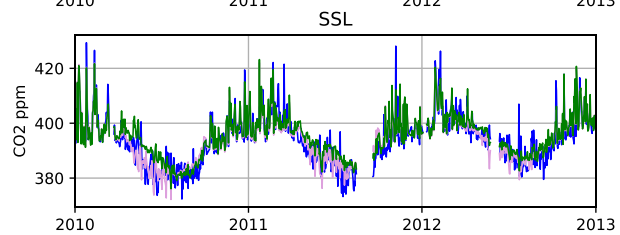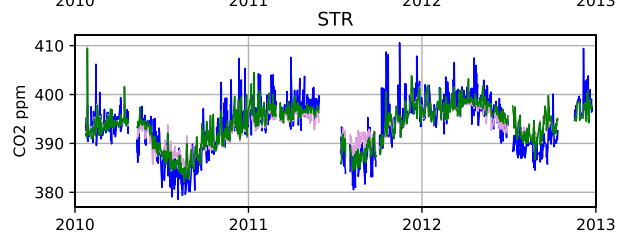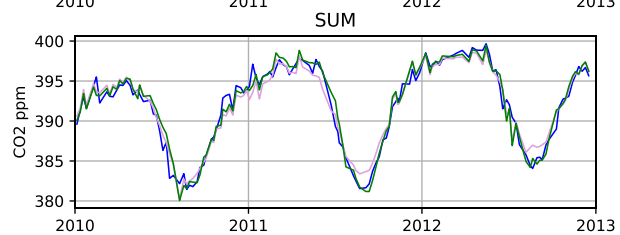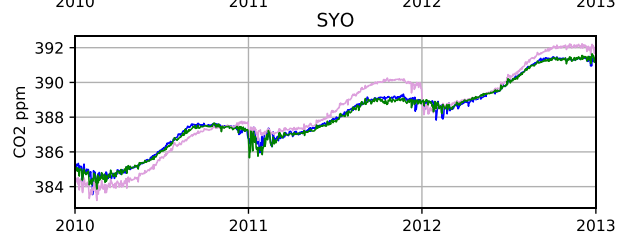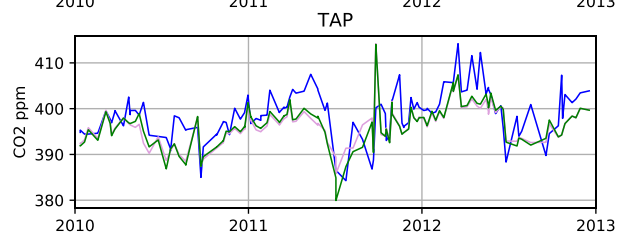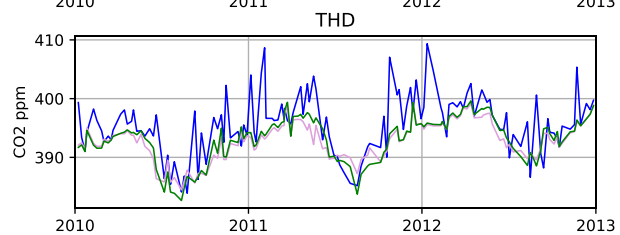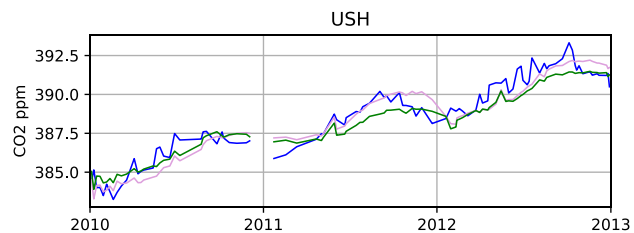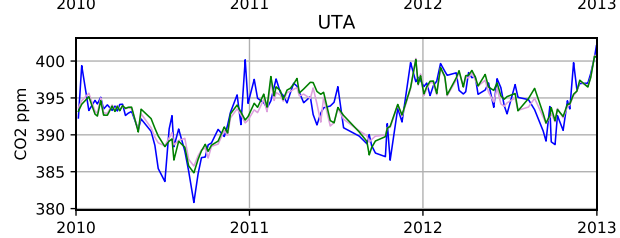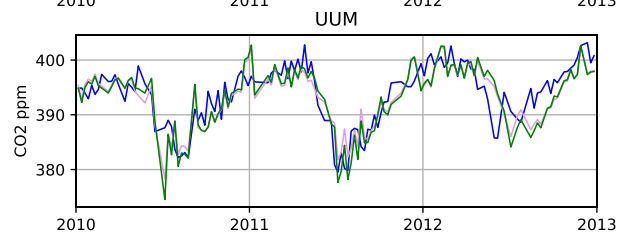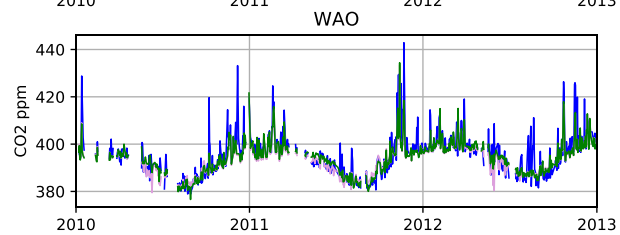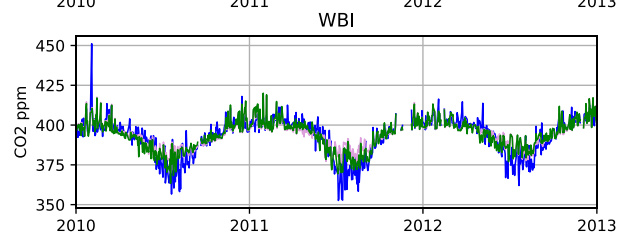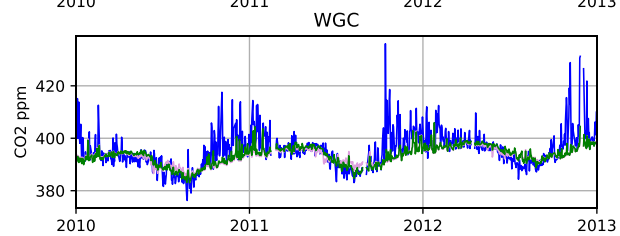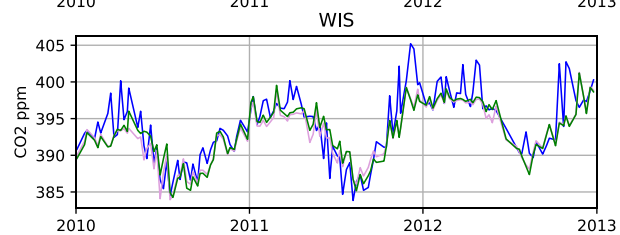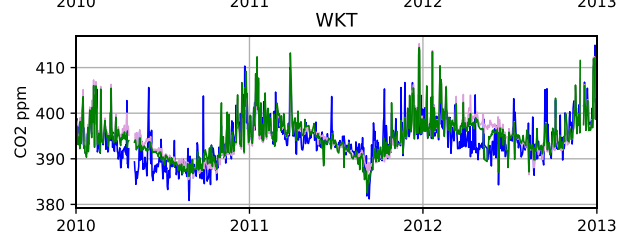

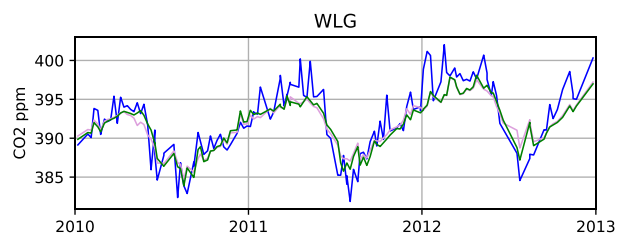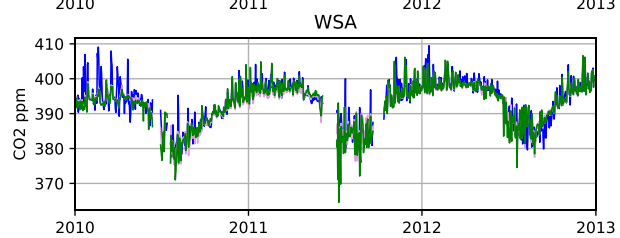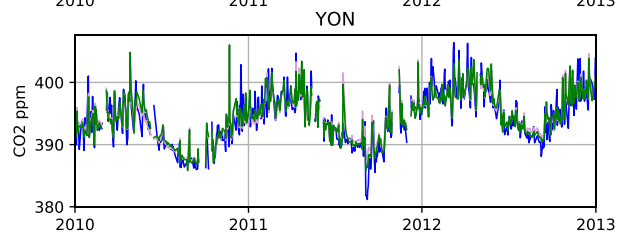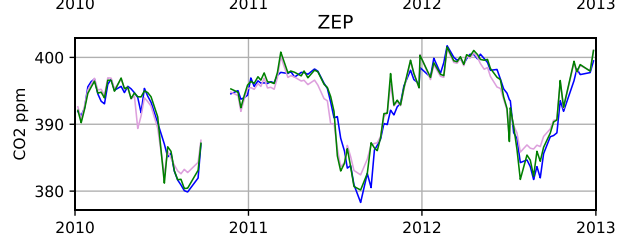

Fig. S2. Time series plots for aircraft data and model simulations used in validation (blue – observed, plum – forward, green – optimized)

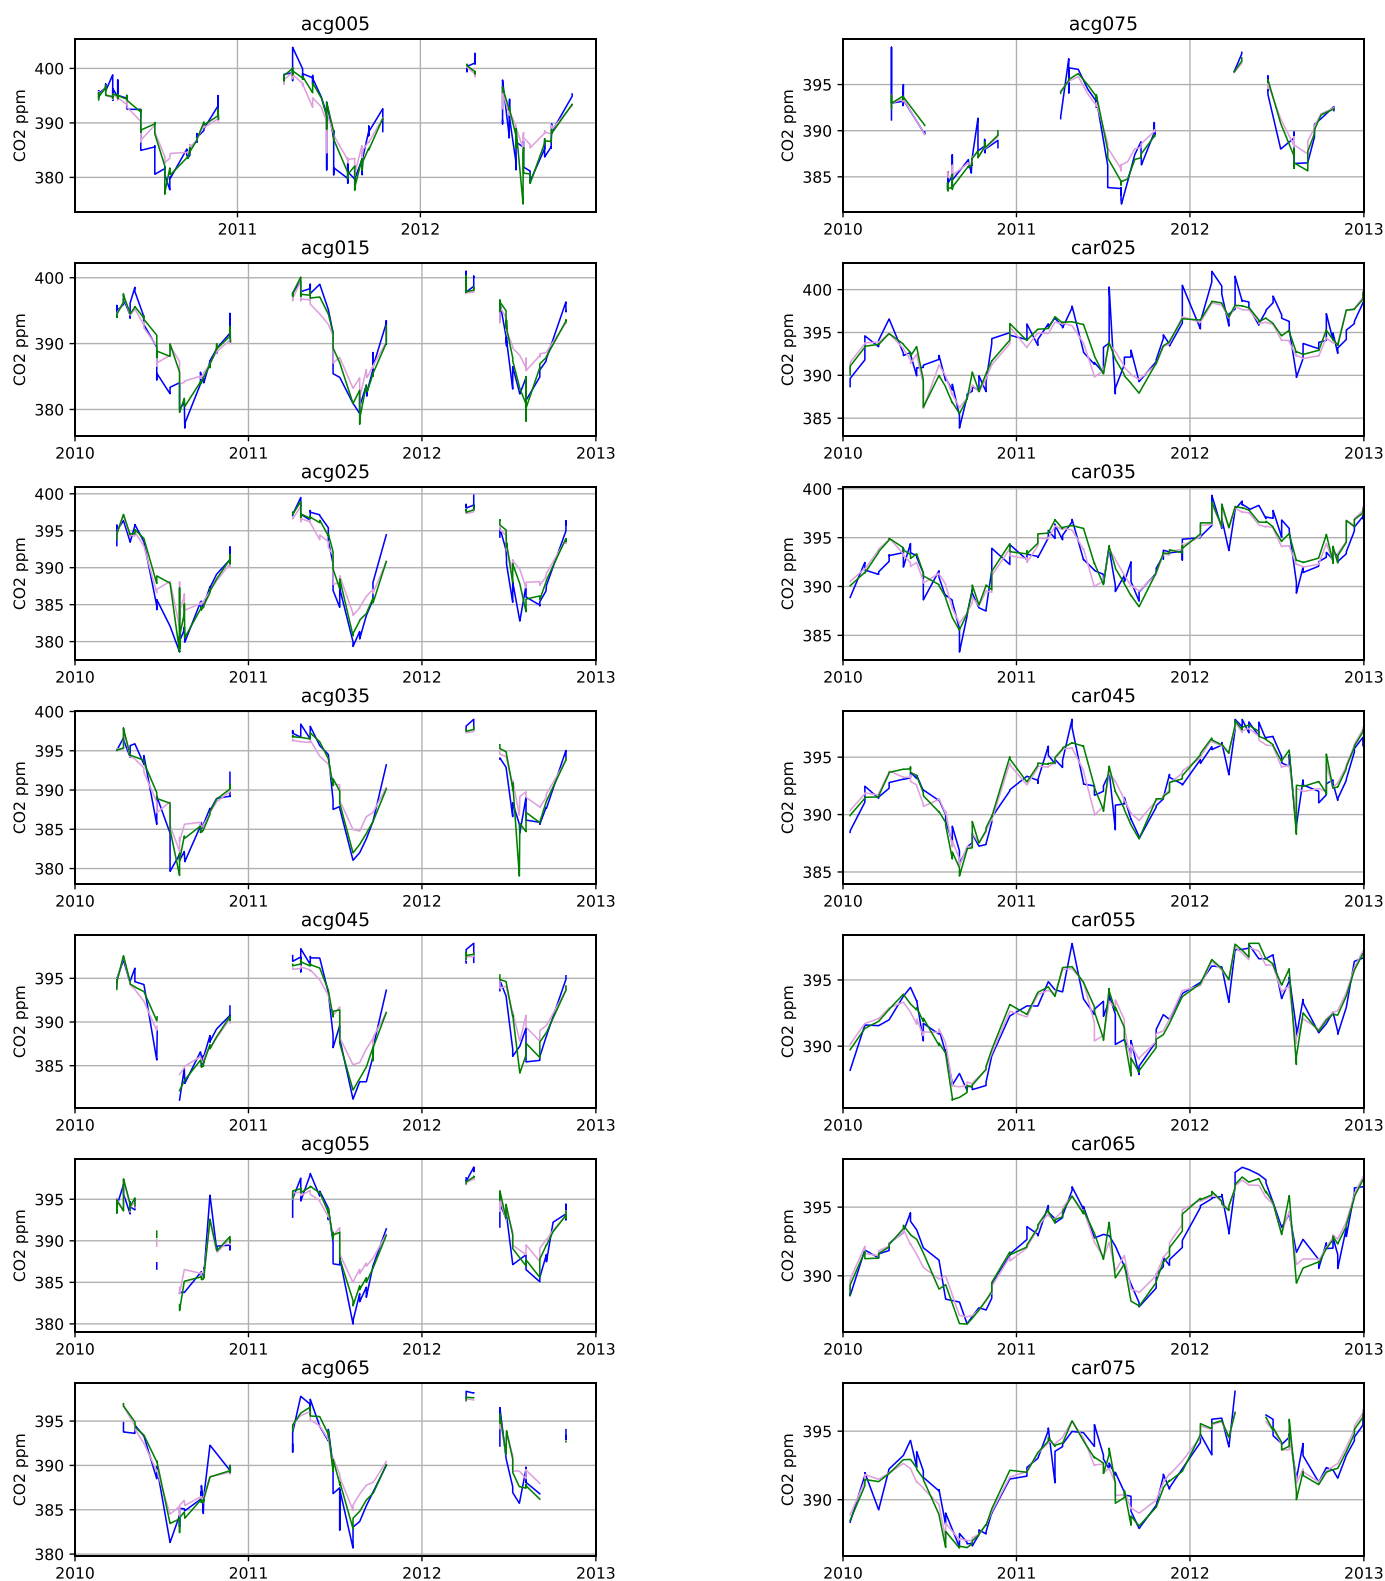

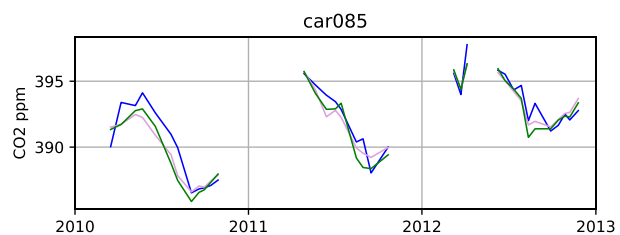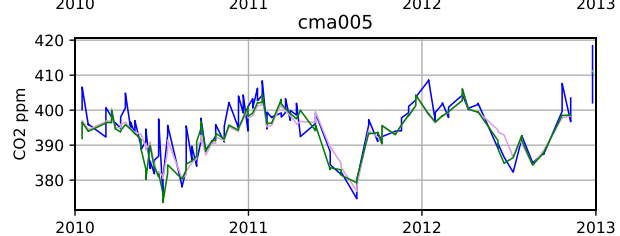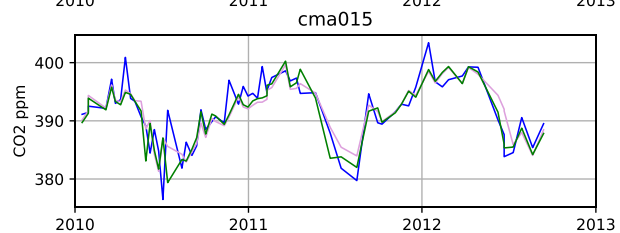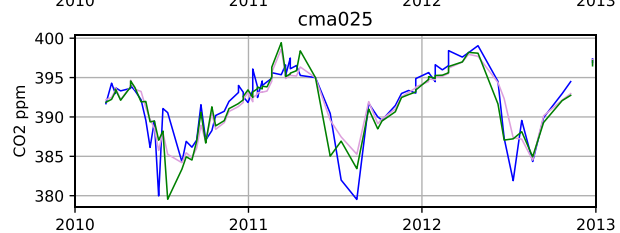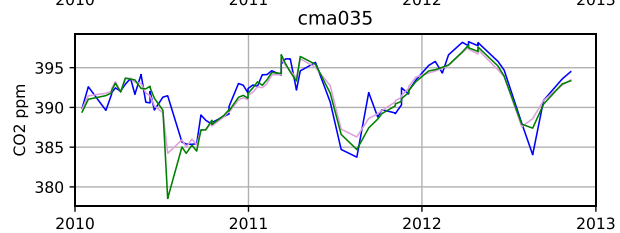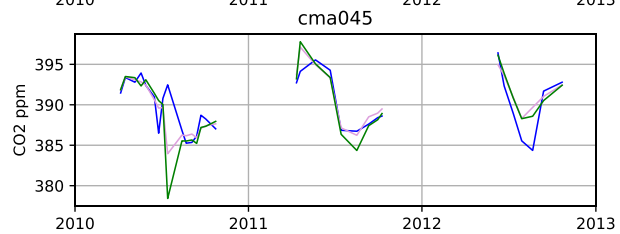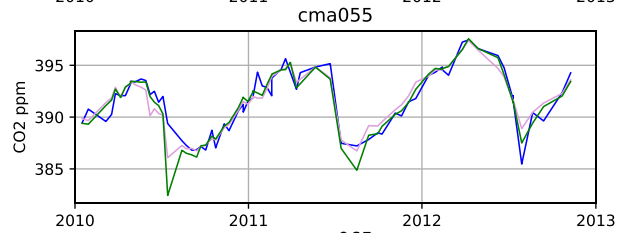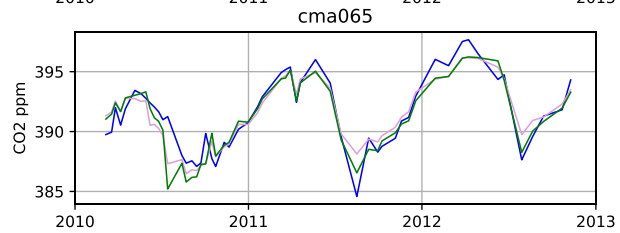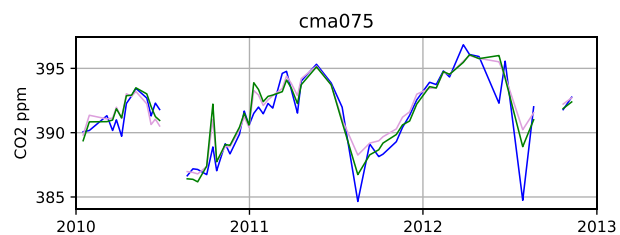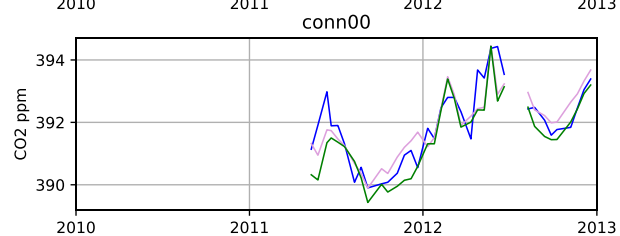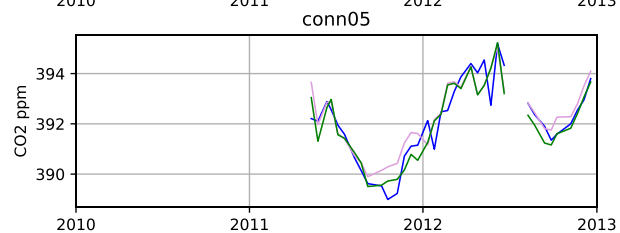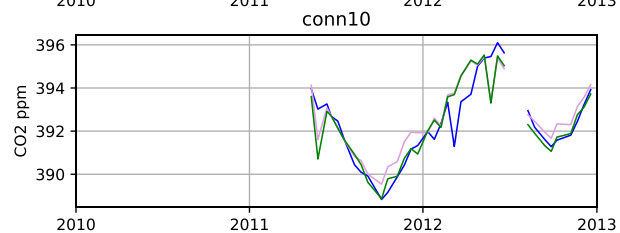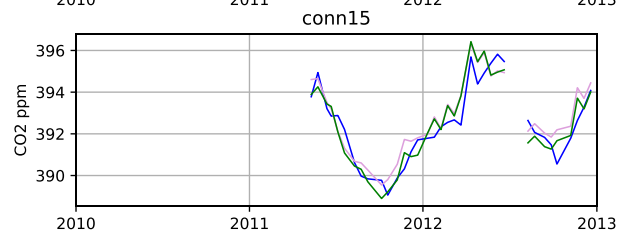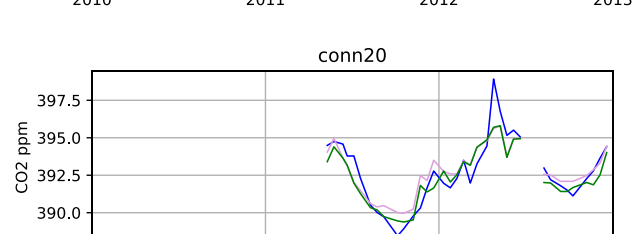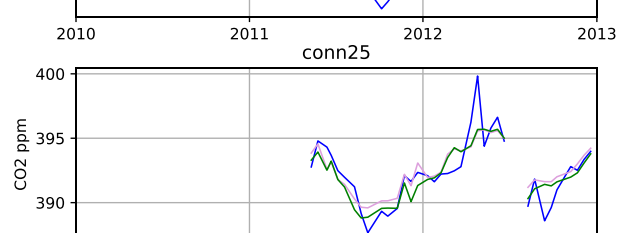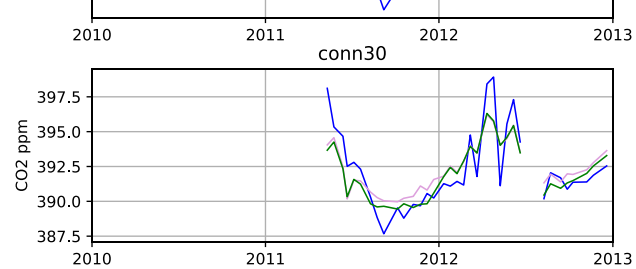

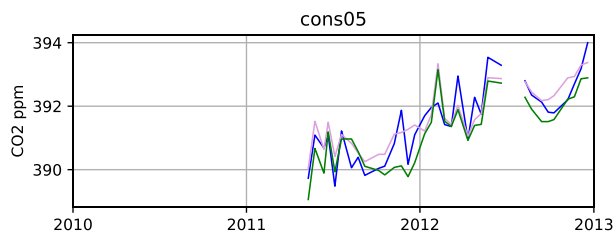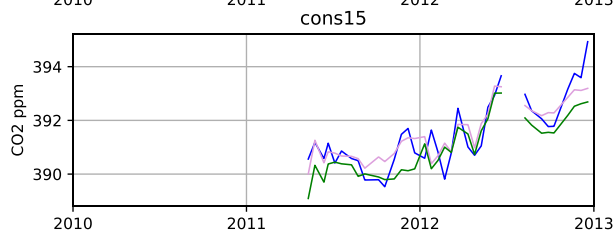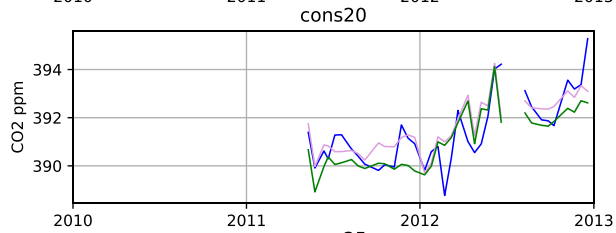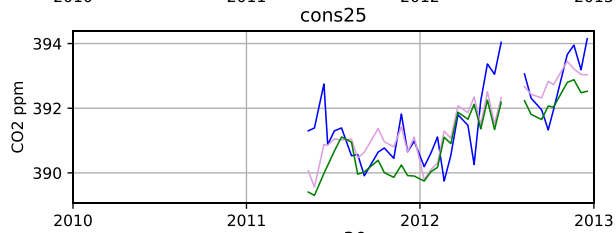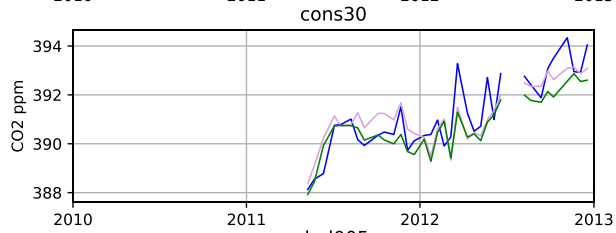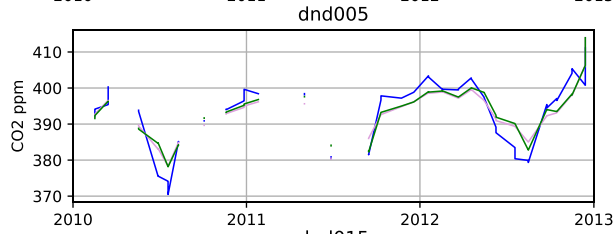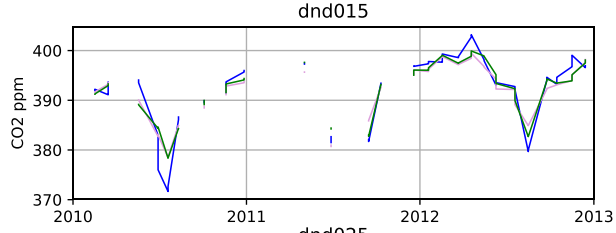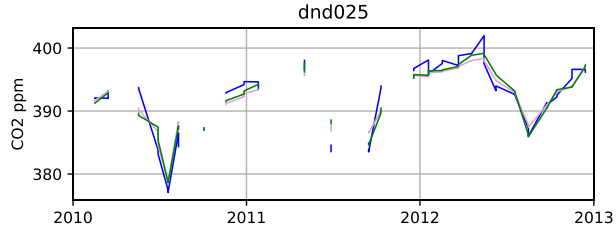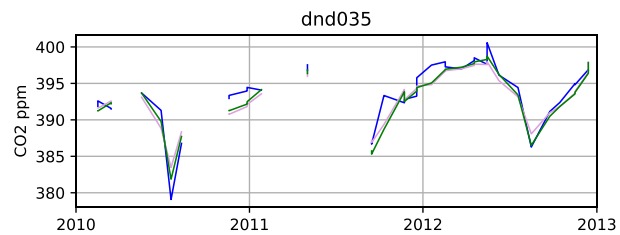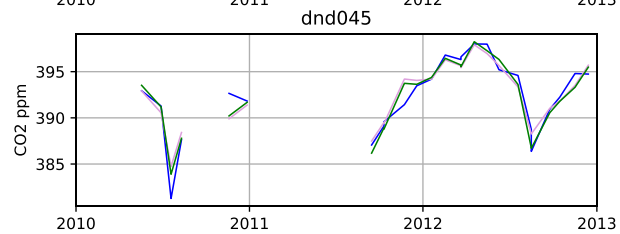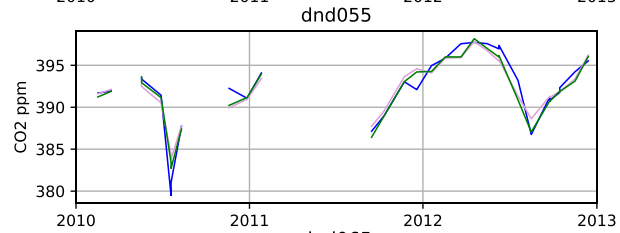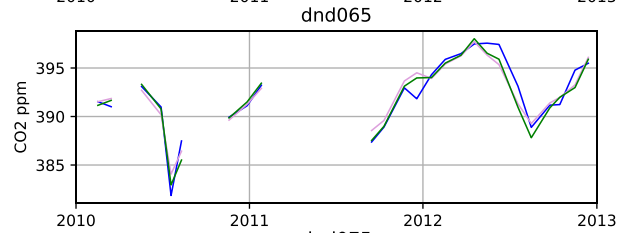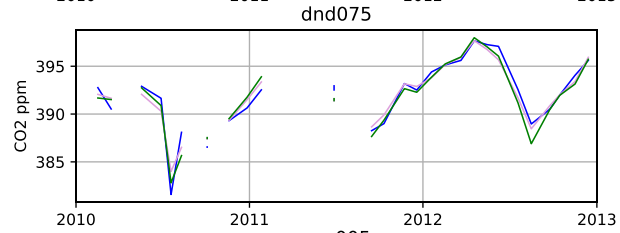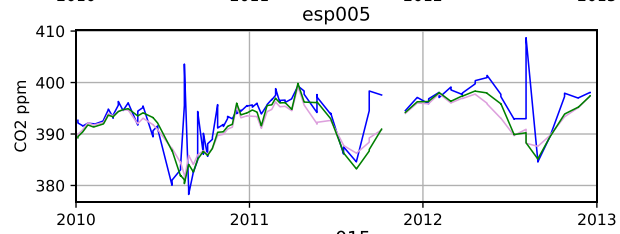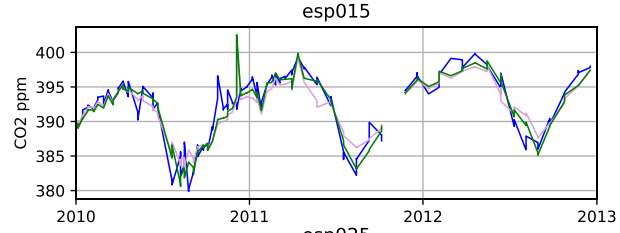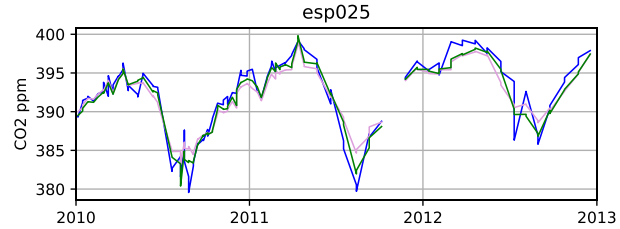

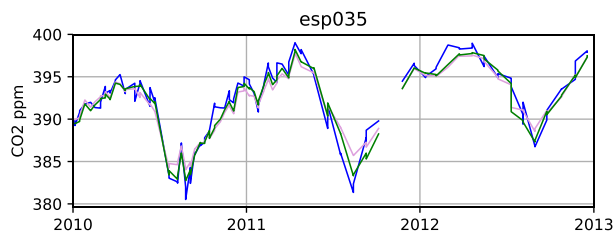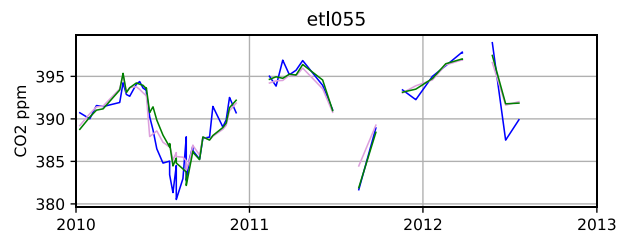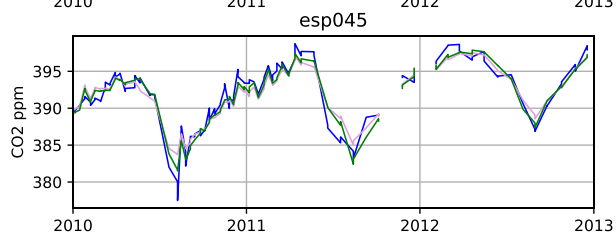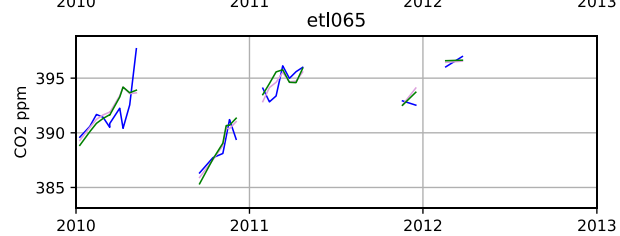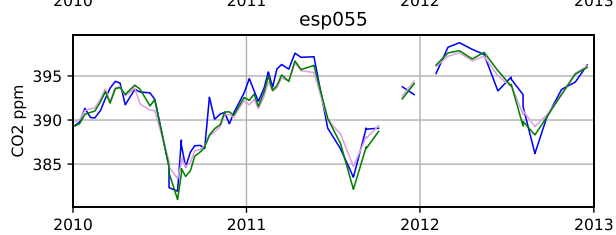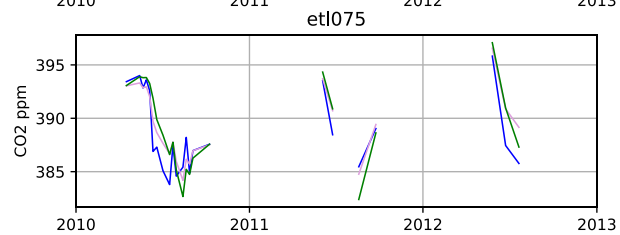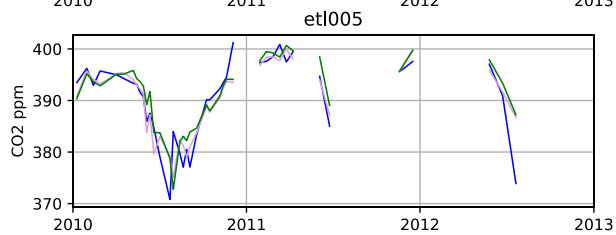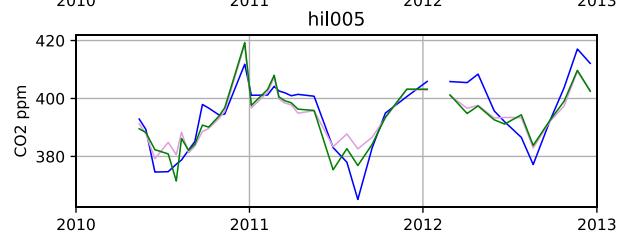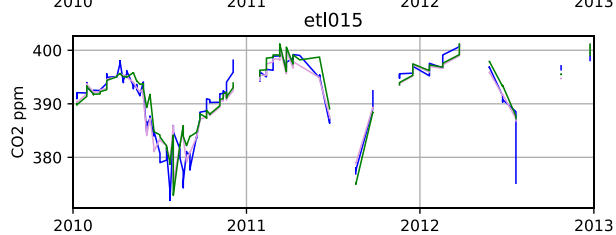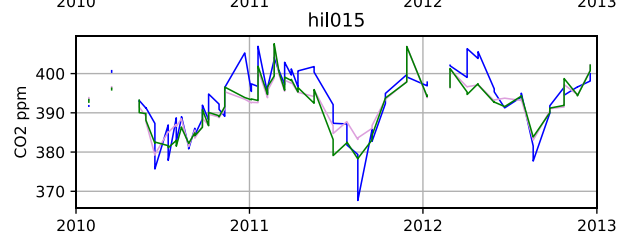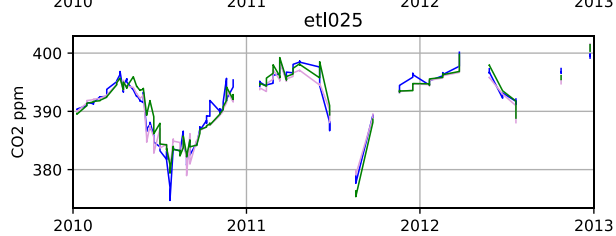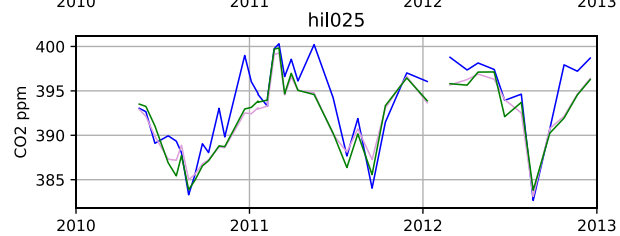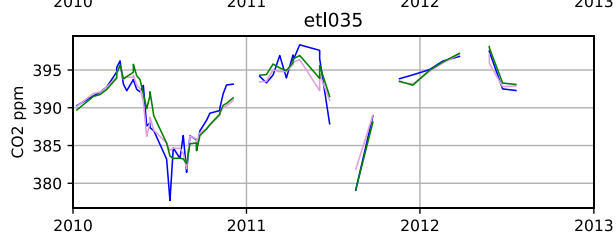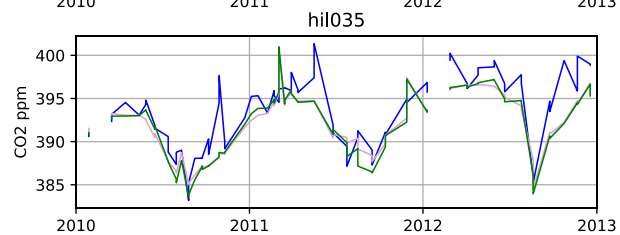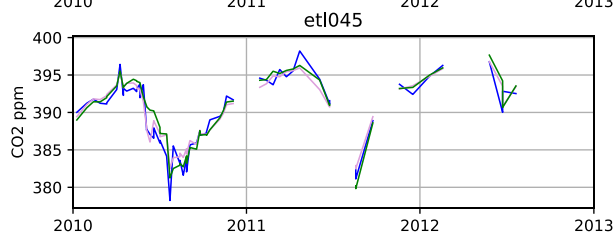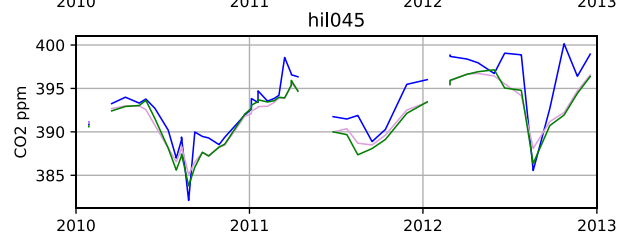

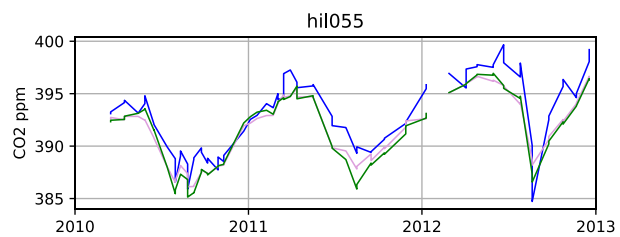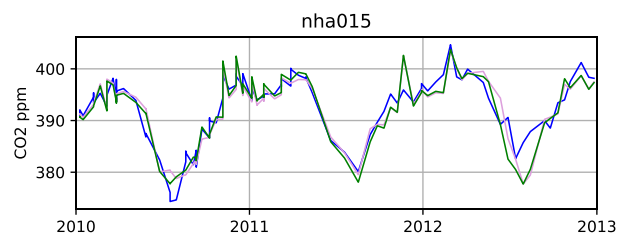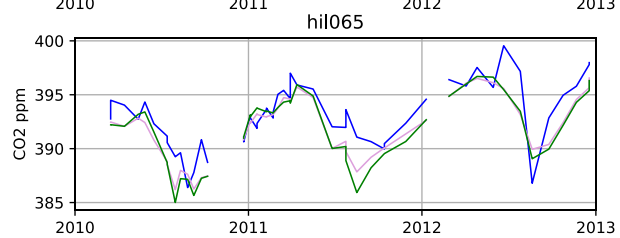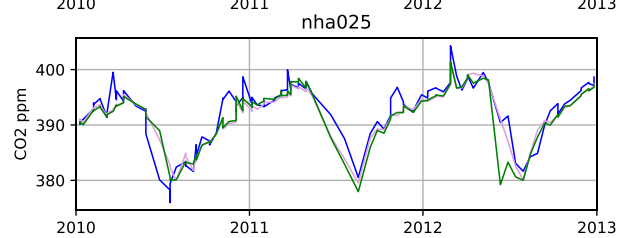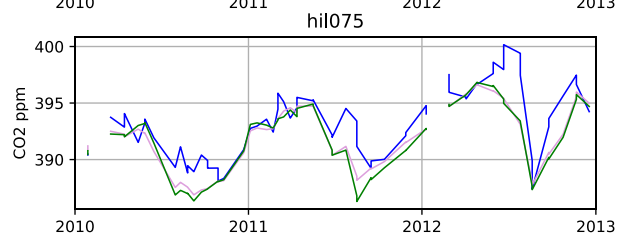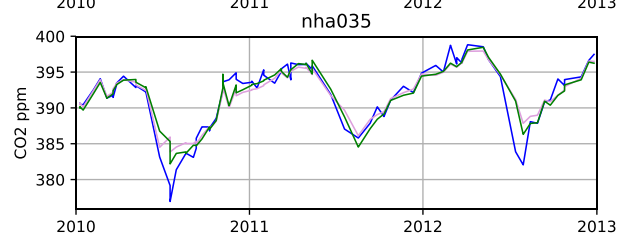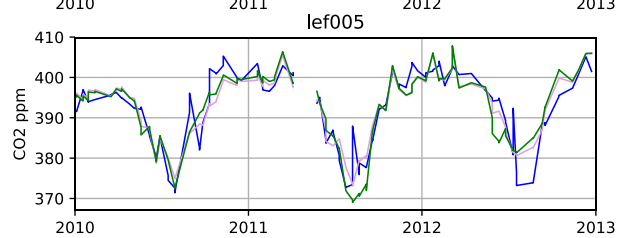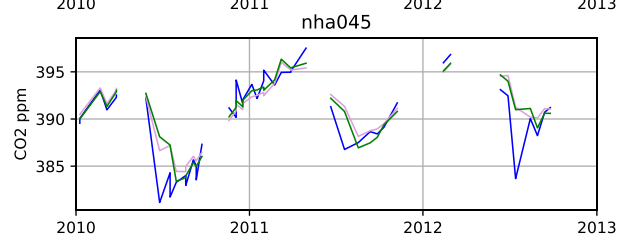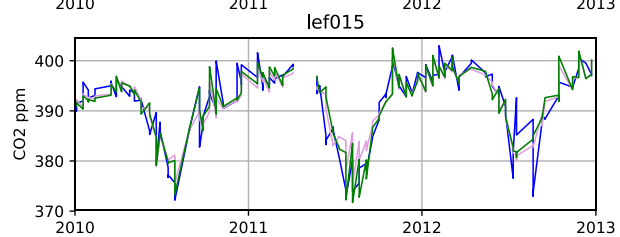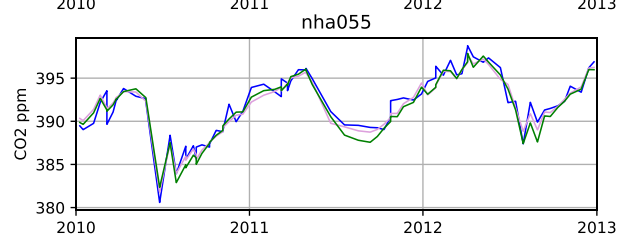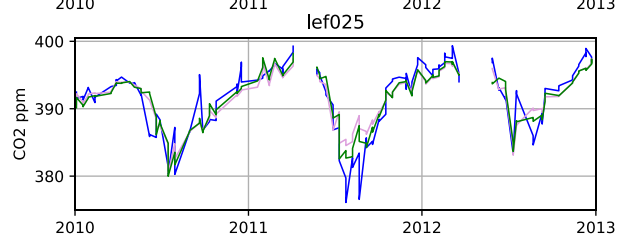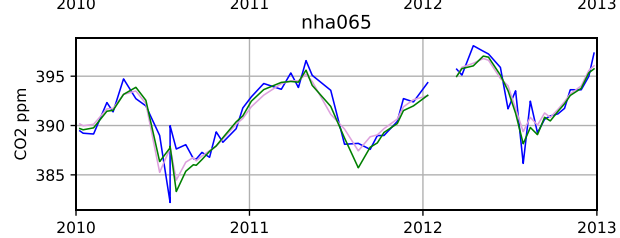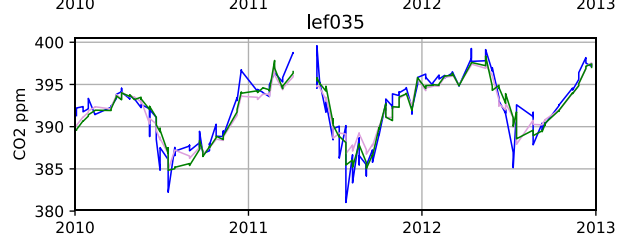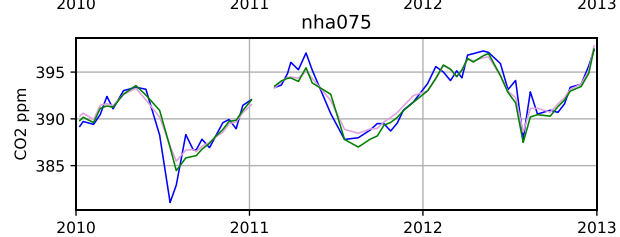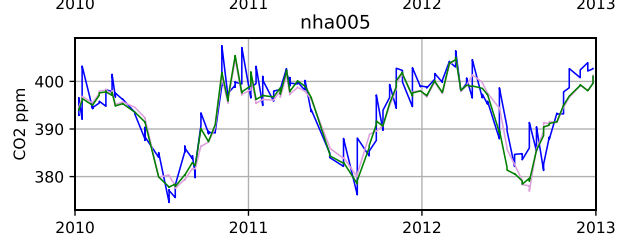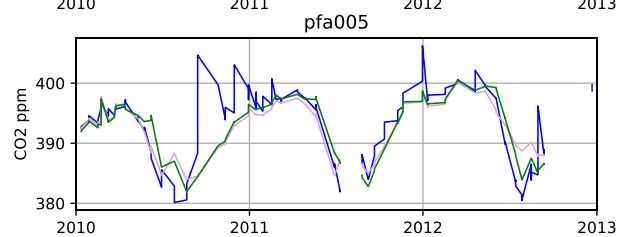

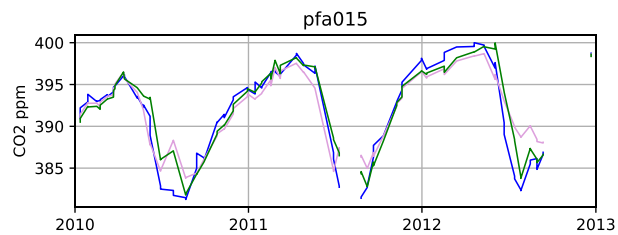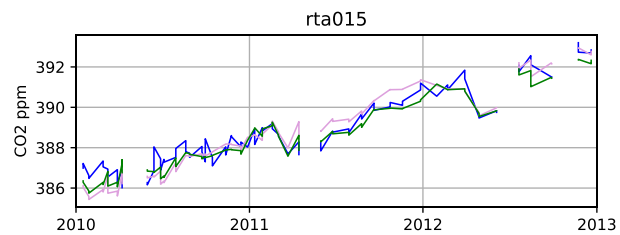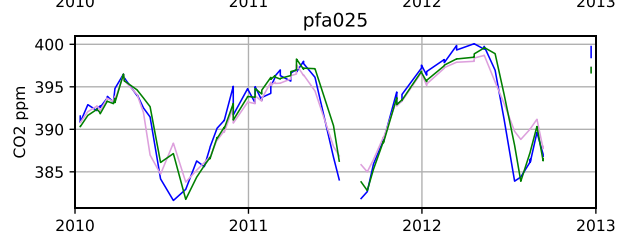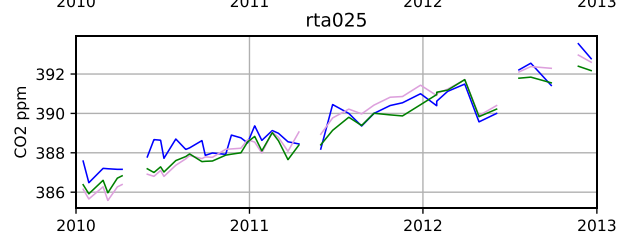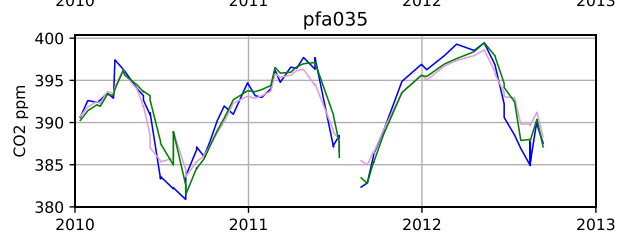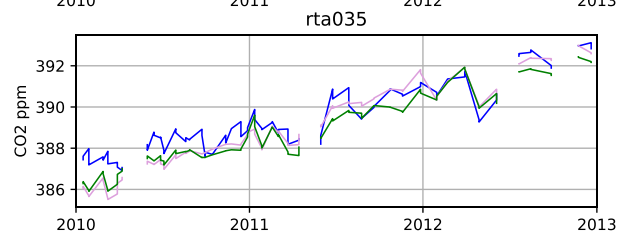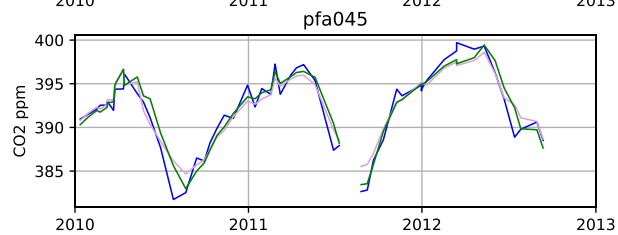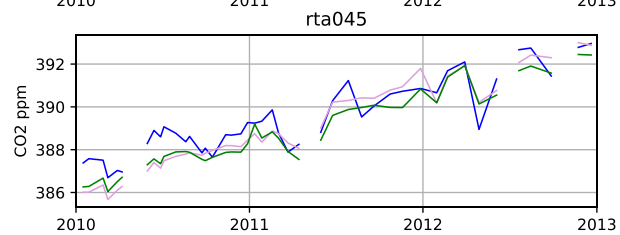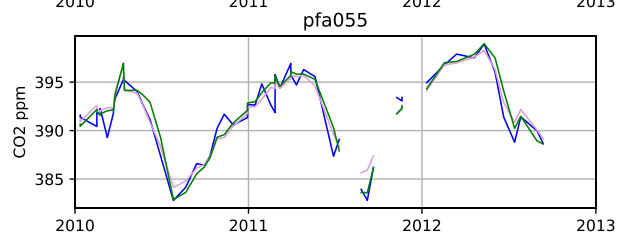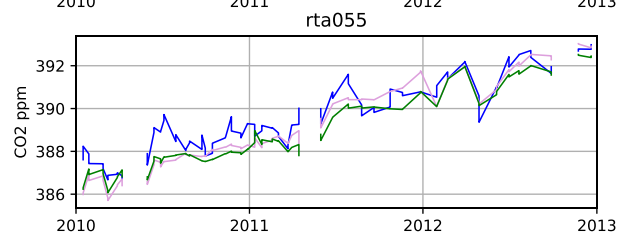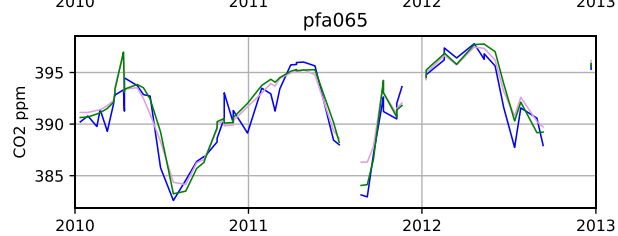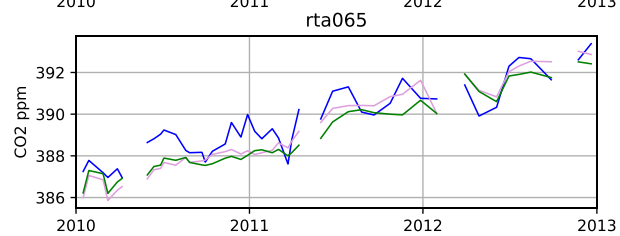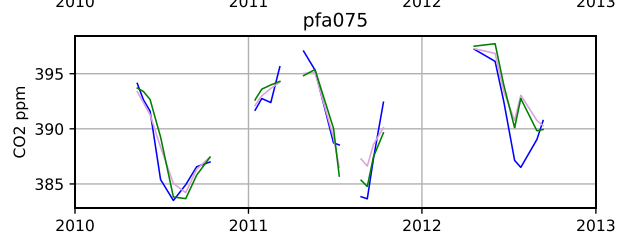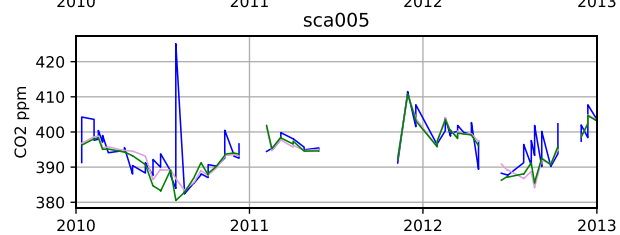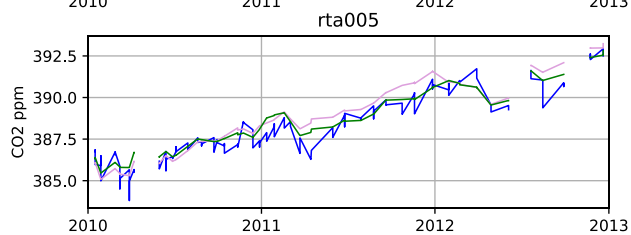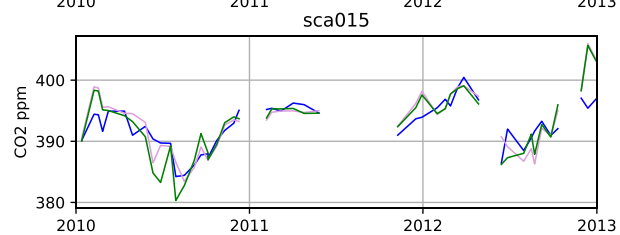

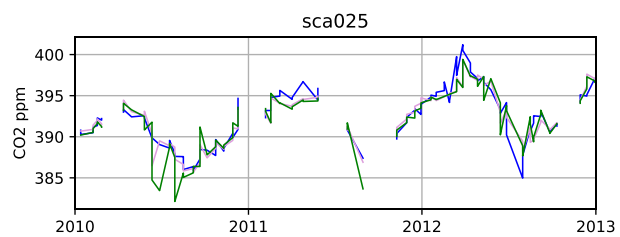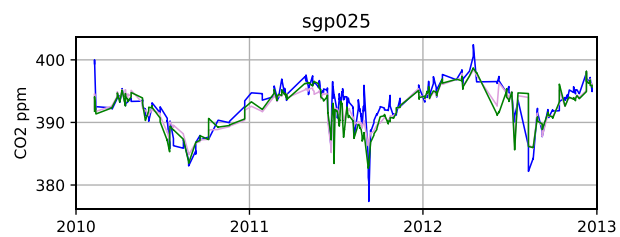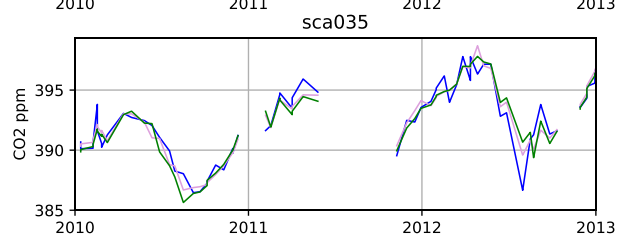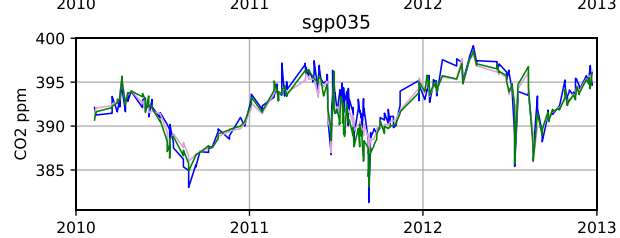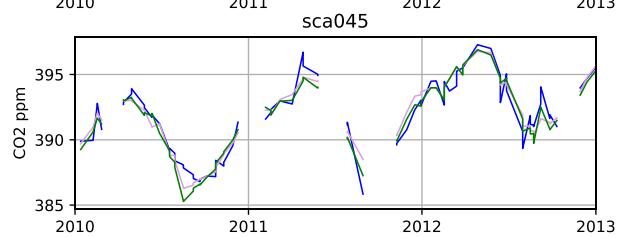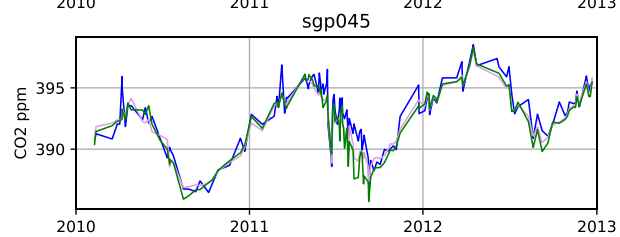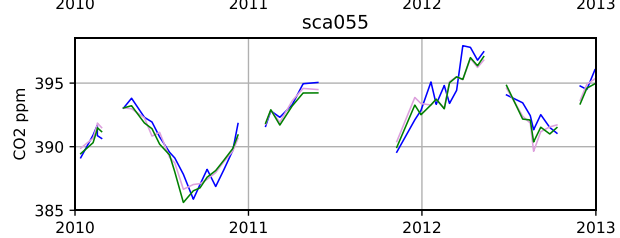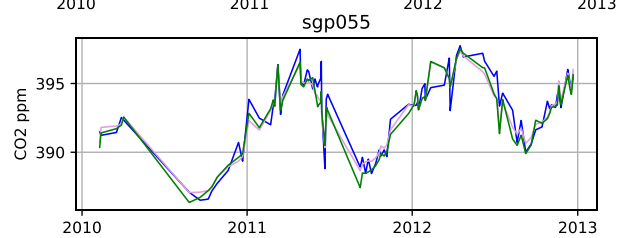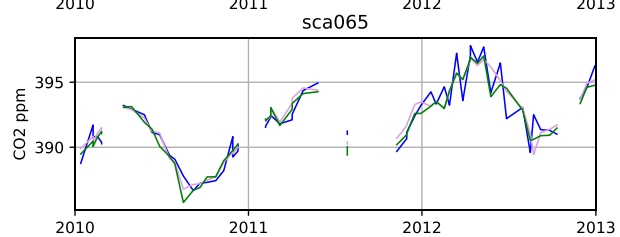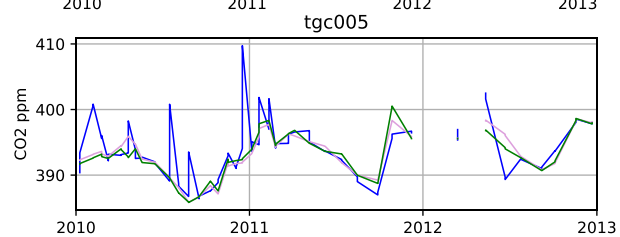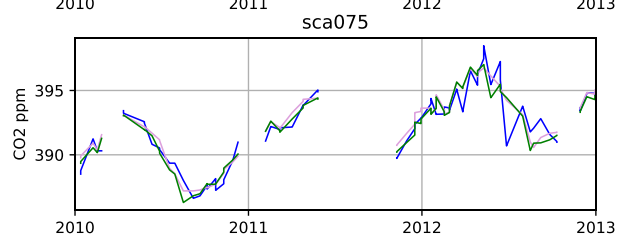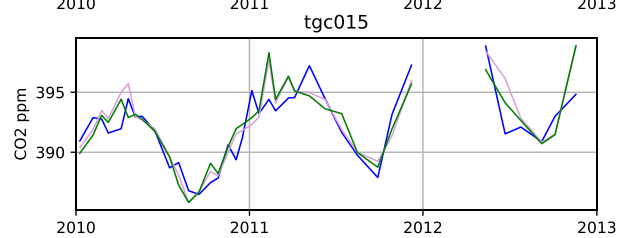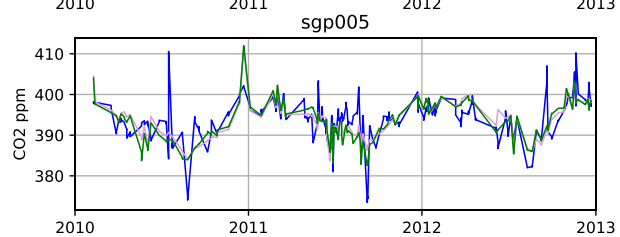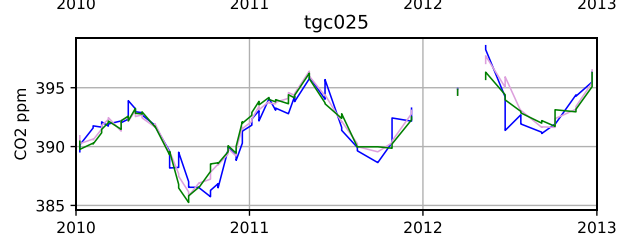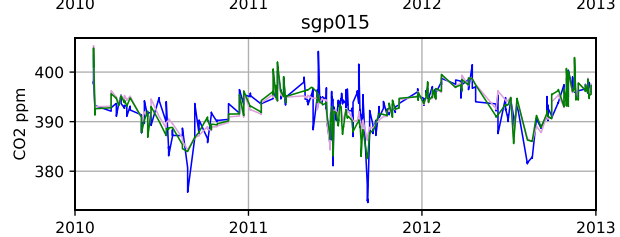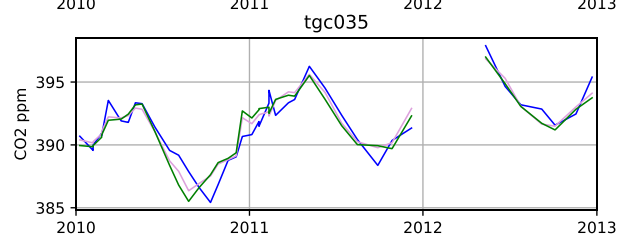

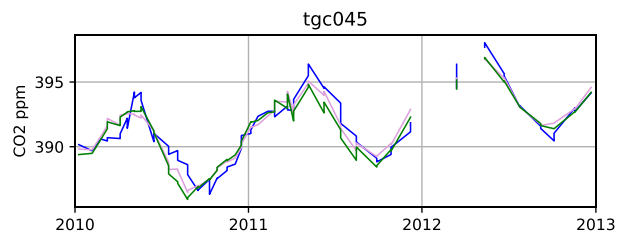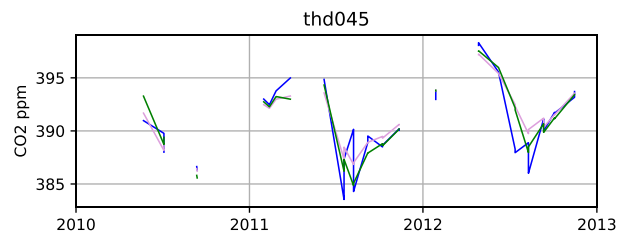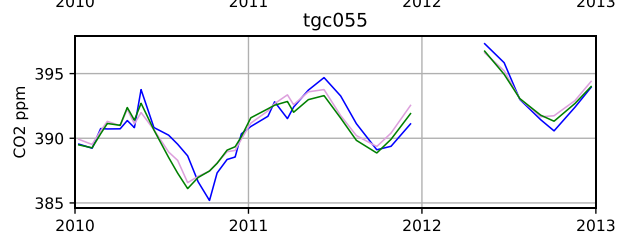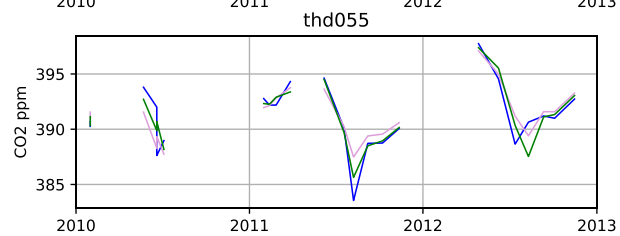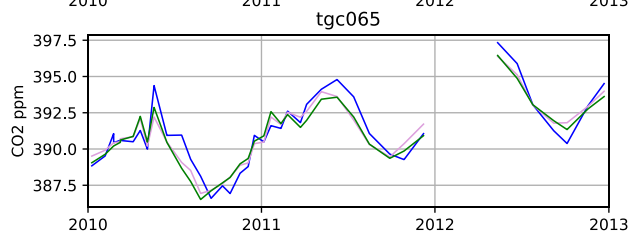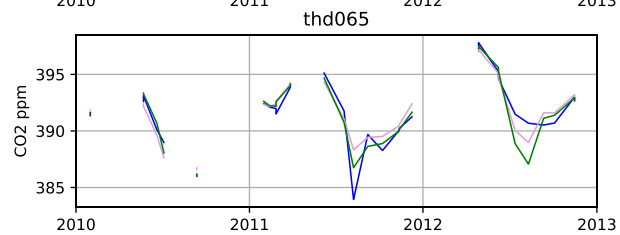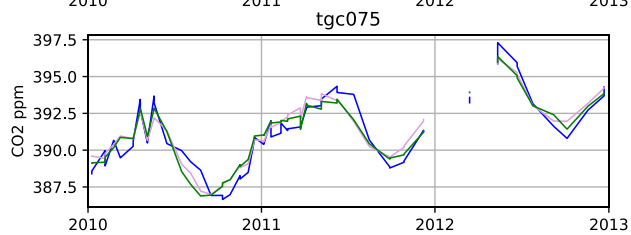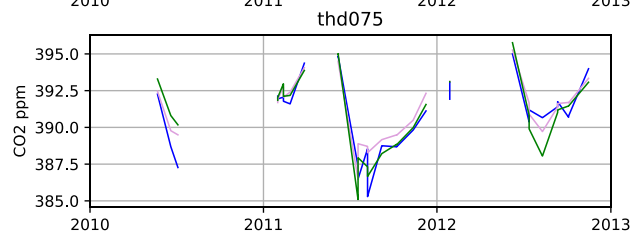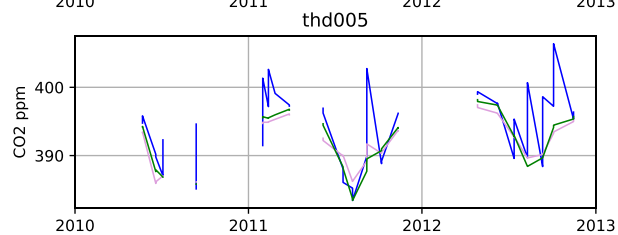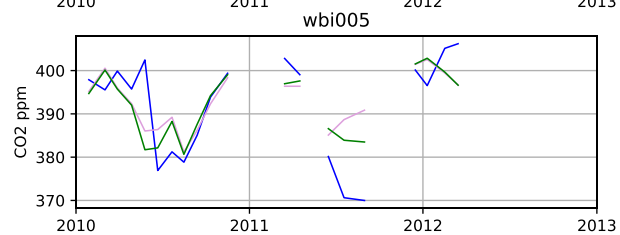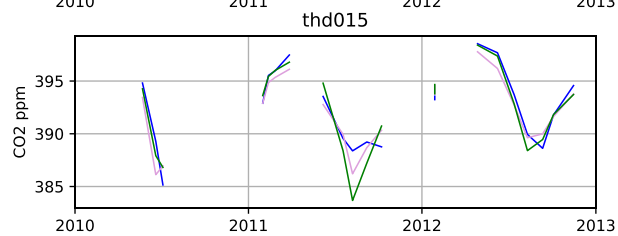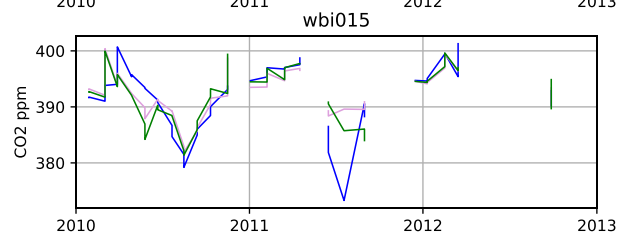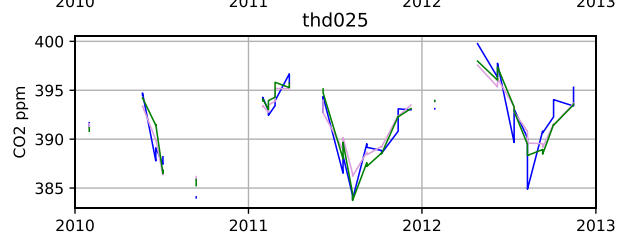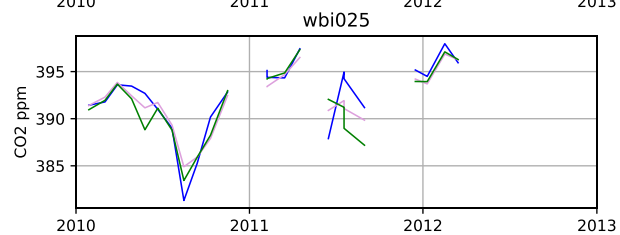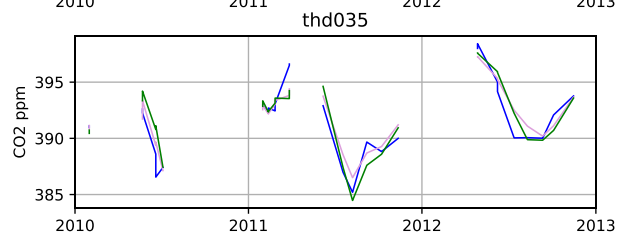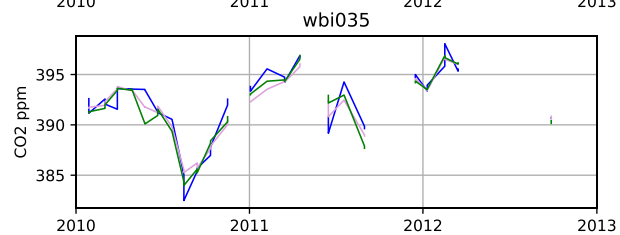

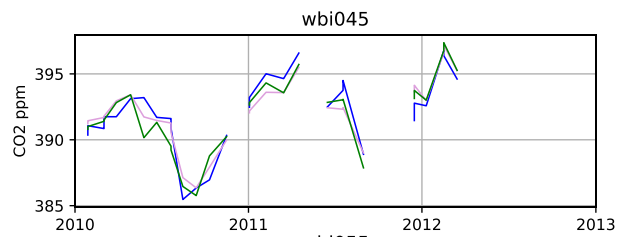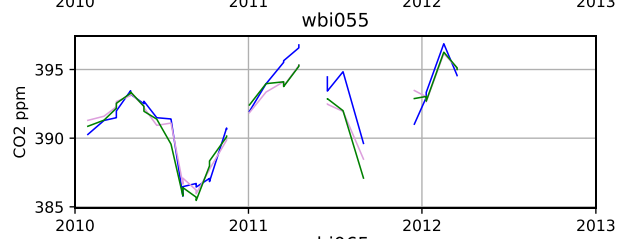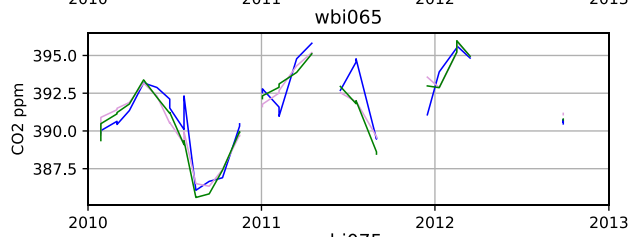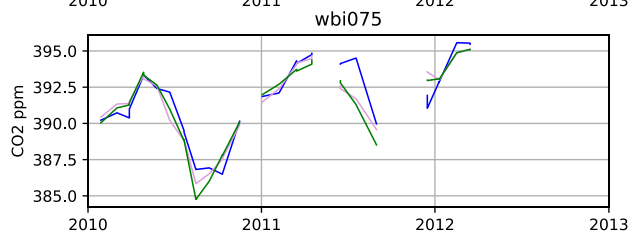

Supplement: Supplementary file 1 [file acp-21-1245-2021-supplement.pdf]
